# Supplementary material for: Design and preparation of hollow triple-shell CaMgFe2O4 nanospheres for green synthesis of spiro-dihydrofurans under solvent free conditions
Source: Royal Society of Chemistry journal article supplement (doi:10.1039/d2nj04507a), 2022-11-16
Supplement: d2nj04507a1.pdf [file d2nj04507a1.pdf]

## Supporting information

### **Design and preparation of hollow triple-shell CaMgFe<sub>2</sub>O<sub>4</sub> nanospheres for green synthesis of spiro-dihydrofurans under solvent free conditions**

Somayeh Kazempour, Hossein Naeimi\*

*Department of Organic Chemistry, Faculty of Chemistry, University of Kashan, Kashan, 87317-51167, I.R. Iran; Tel: 98-31-55912388; Fax: 983155912397; E-mail: [Naeimi@kashanu.ac.ir](mailto:Naeimi@kashanu.ac.ir)*

#### **General multicomponent procedure for synthesis of spiro-dihydrofurans**

Spiro-dihydrofurans synthesized from the multi-component reaction. In this process, benzaldehyde (1 mmol), dimedone (2 mmol), iodine (1 mmol) and catalyst (0.01 mg, CaMgFe<sub>2</sub>O<sub>4</sub>) to make spiro-dihydrofurans derivatives mixed, and stirred in 50 °C temperature for 85 min. the process followed with thin layer chromatography. After completion of the reaction, EtOH (5 ml) was added and the catalyst was separated by an external magnetic. The crude products were obtained by recrystallization in ethanol to give the pure product.

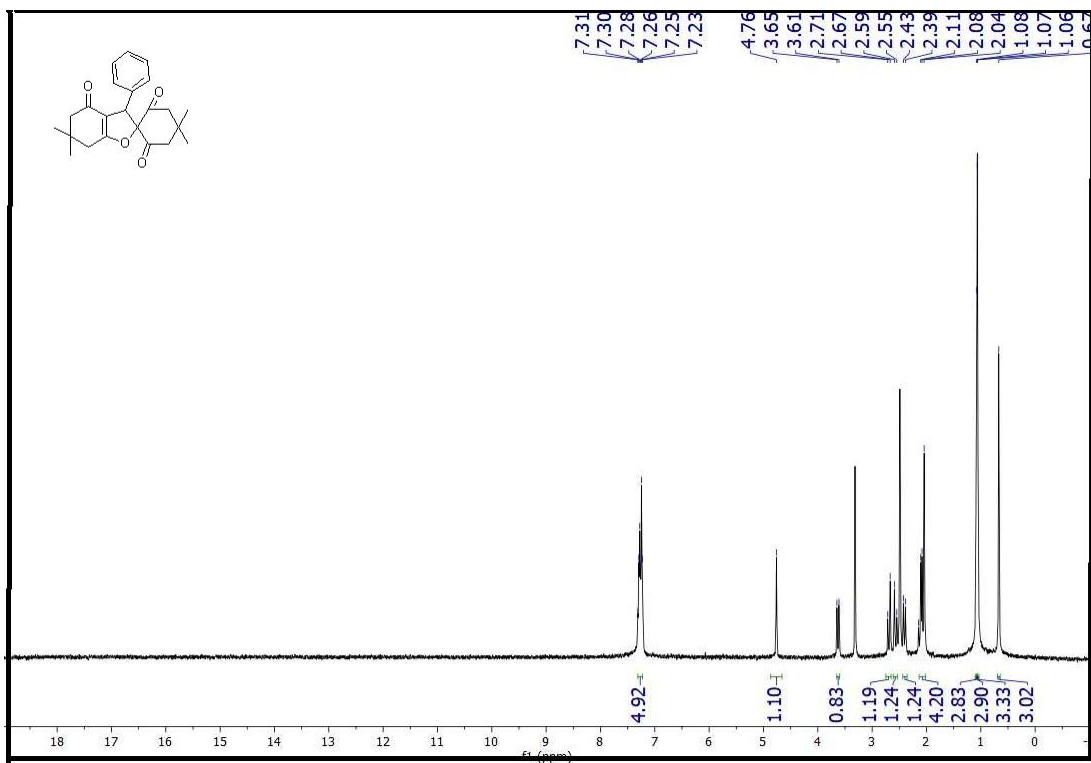

$^1\text{H}$  NMR of **1a**

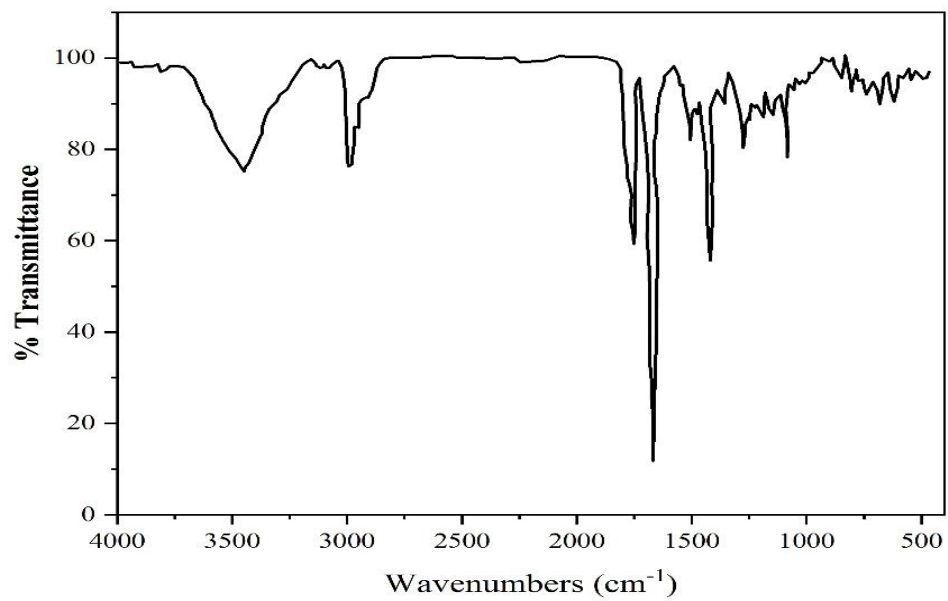

IR of **1a**

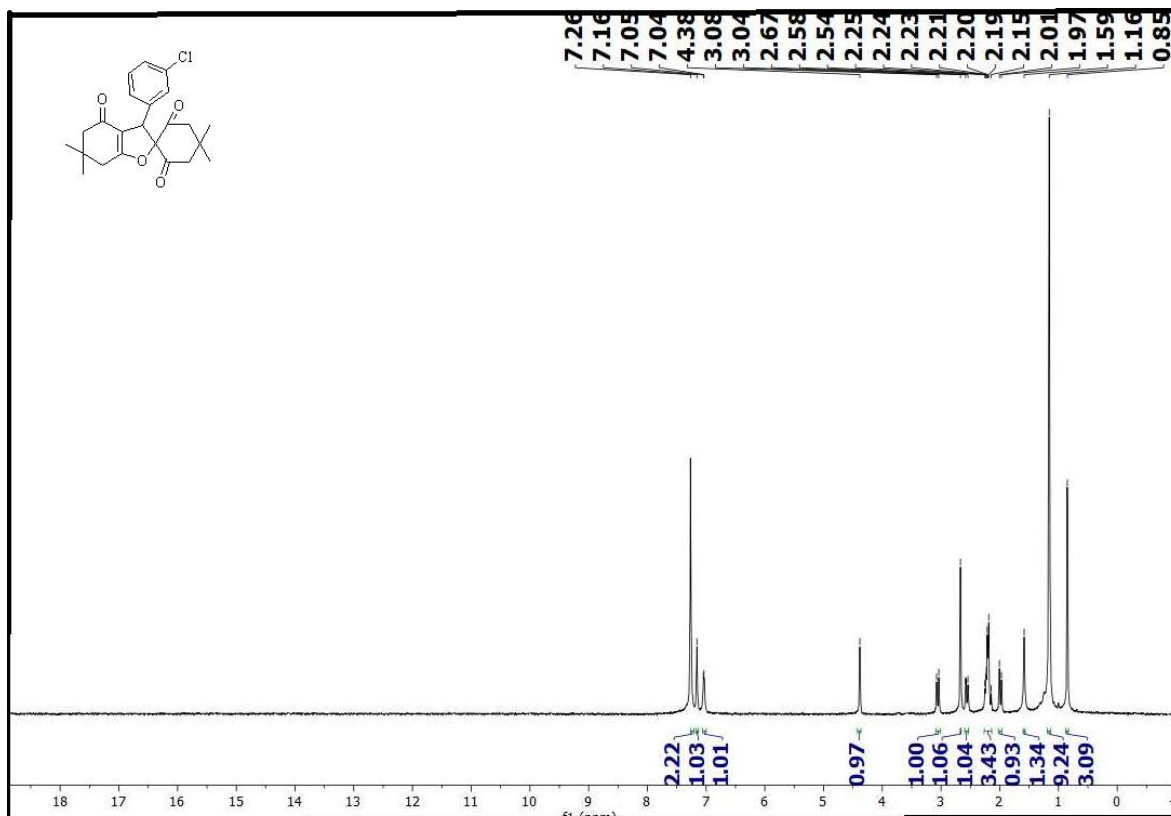

$^1\text{H}$  NMR of 2a

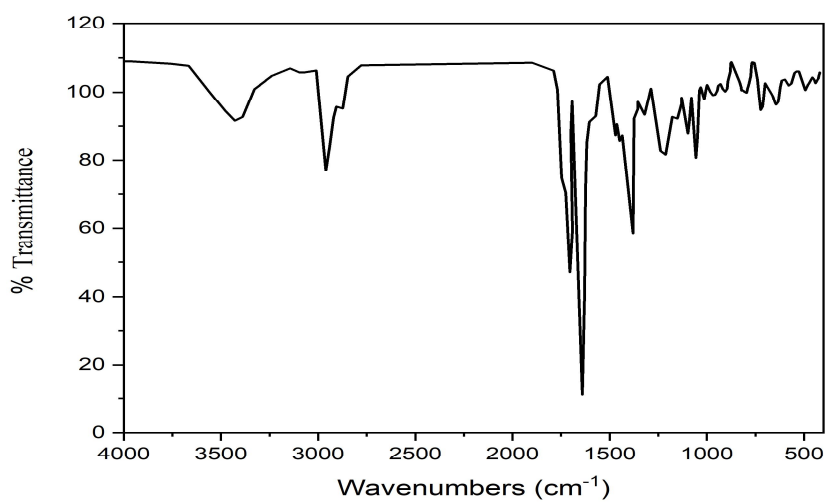

IR of 2a

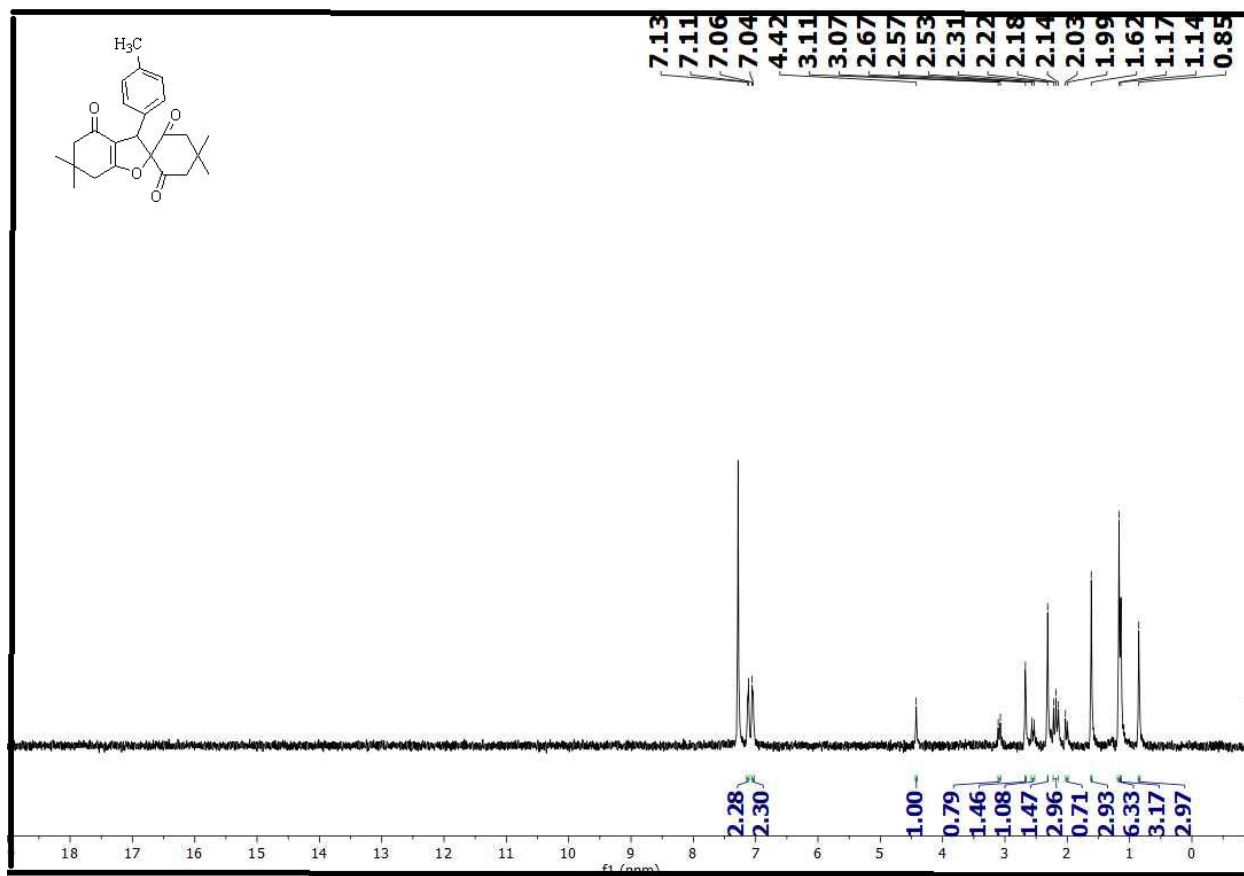

$^1\text{H}$  NMR of 3a

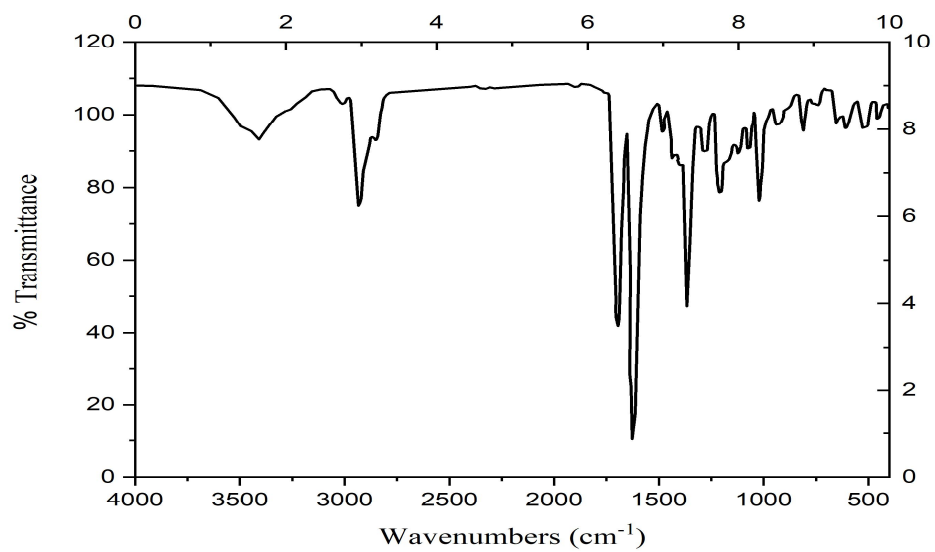

IR of 3a

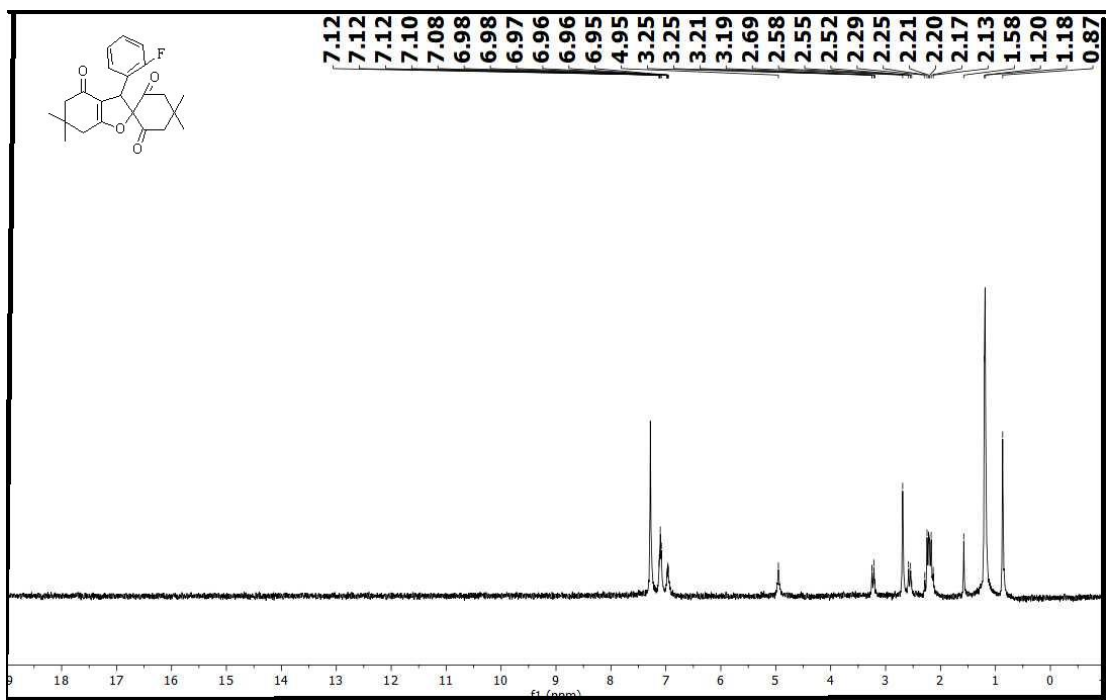

$^1\text{H}$  NMR of 4a

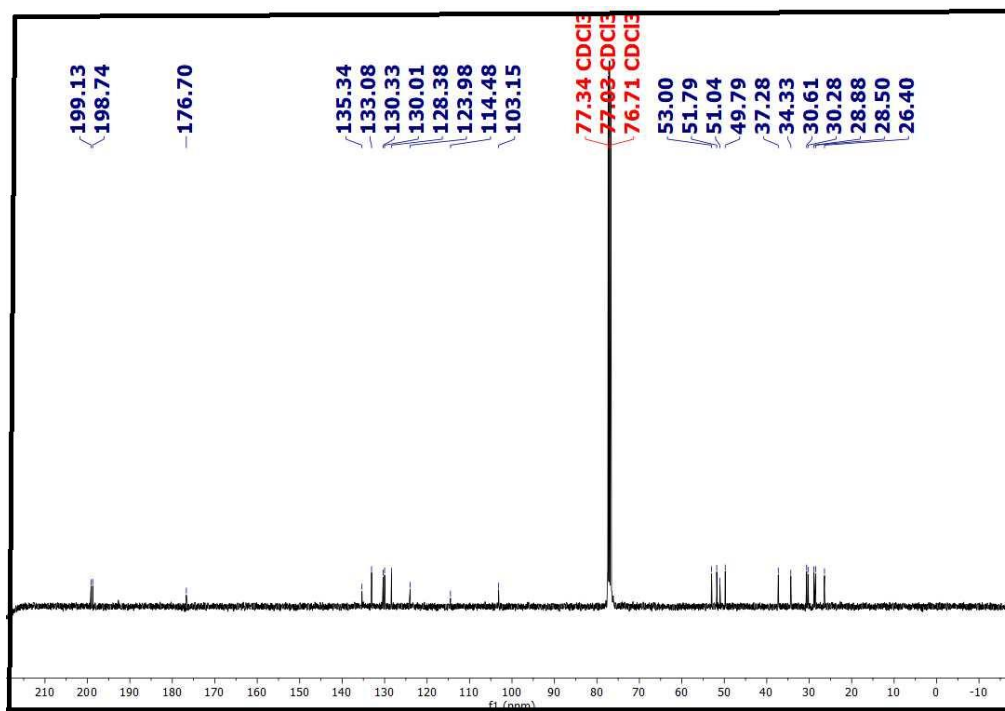

$^{13}\text{C}$  NMR of 4a

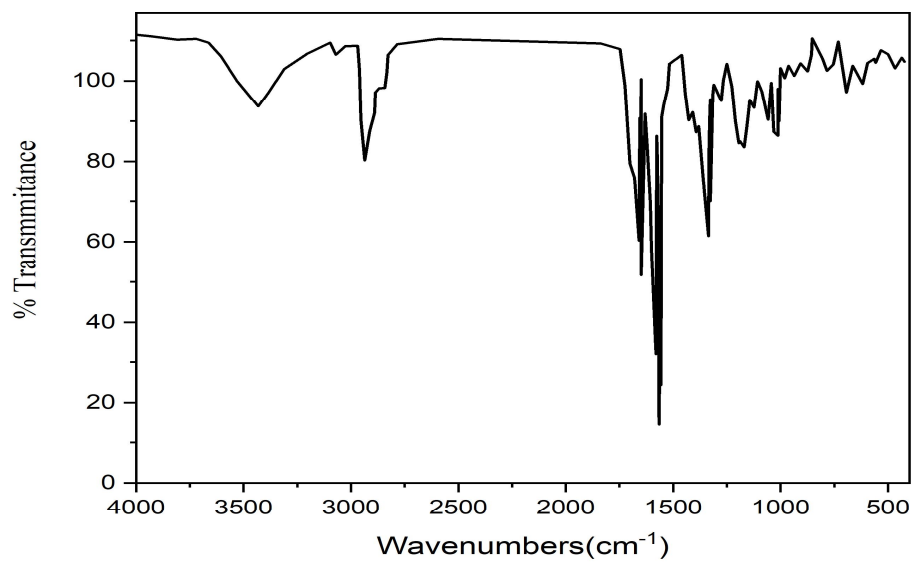

IR of 4a

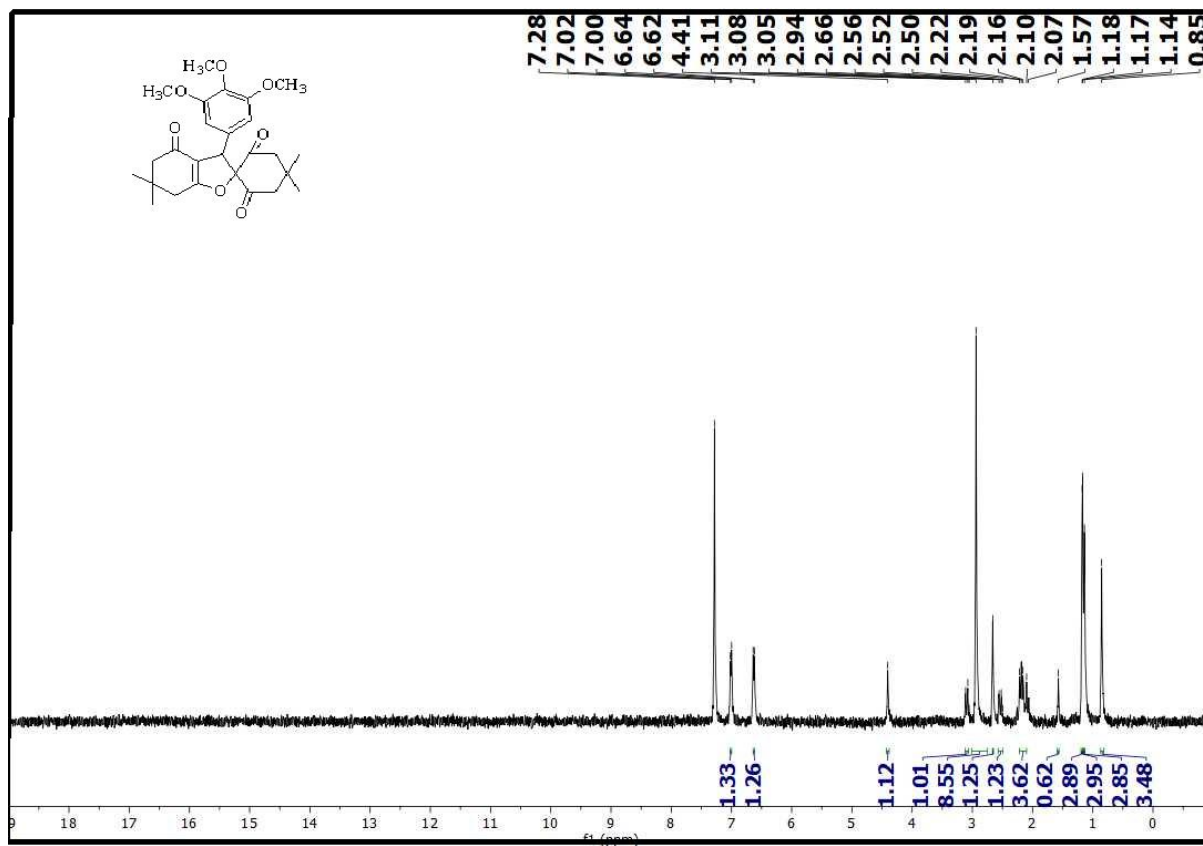

<sup>1</sup>H NMR of 5a

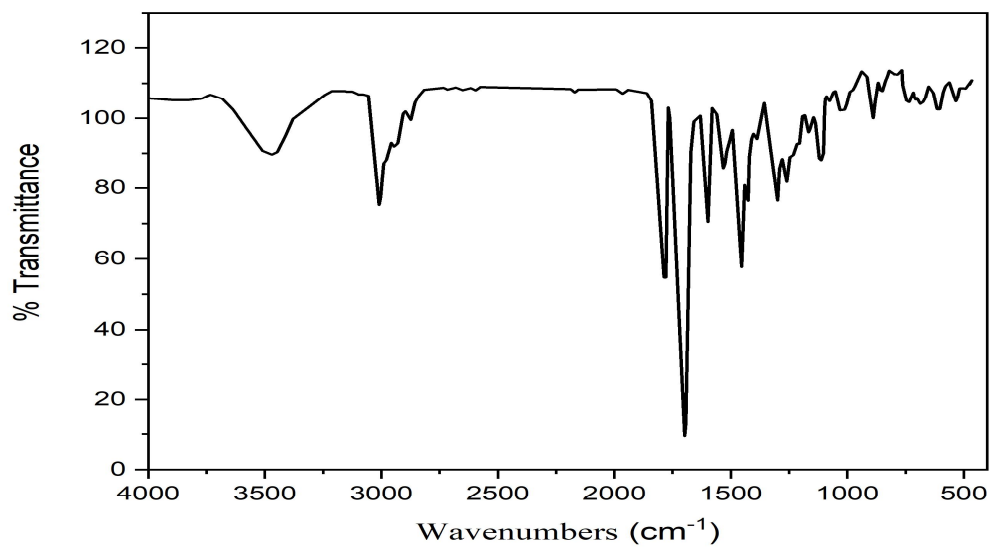

IR of 5a

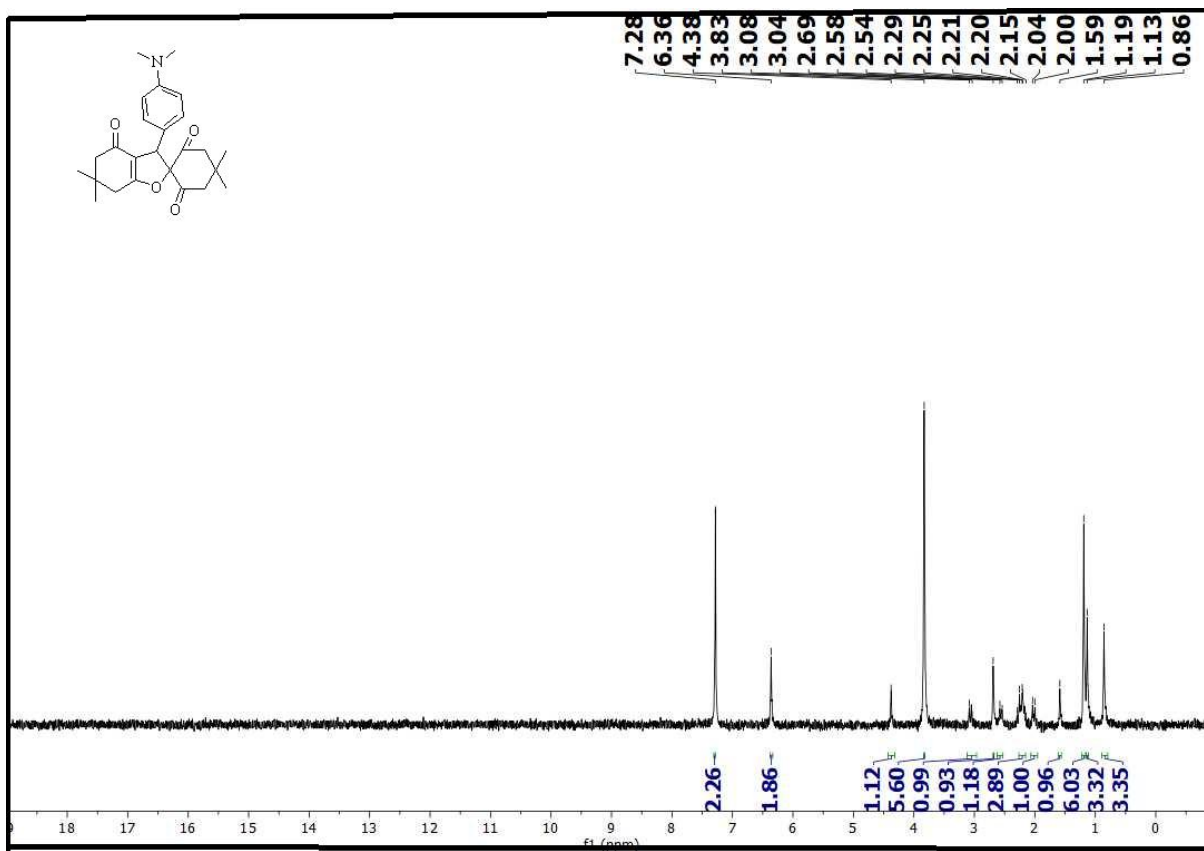

<sup>1</sup>H NMR of 6a

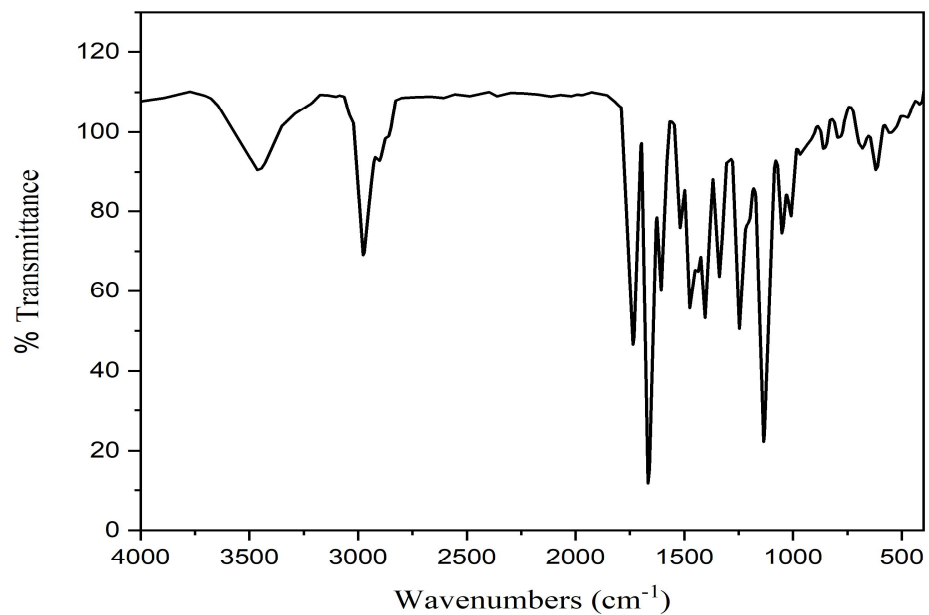

IR of 6a

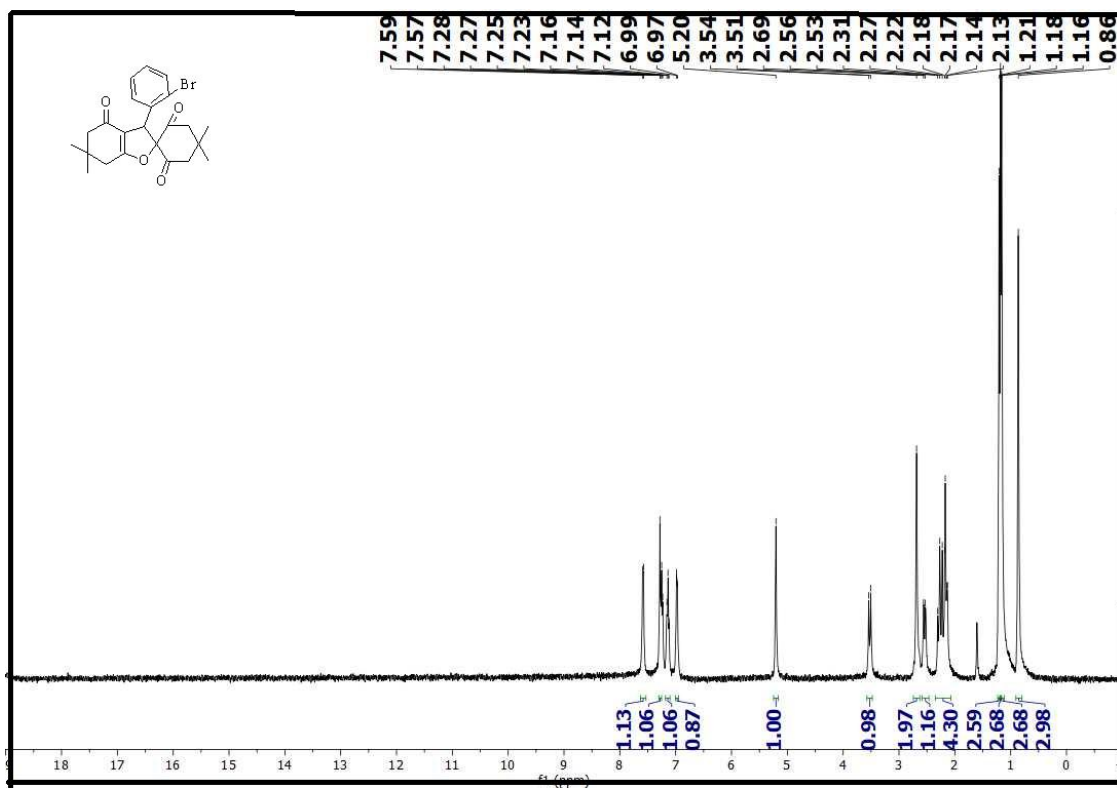

<sup>1</sup>H NMR of 7a



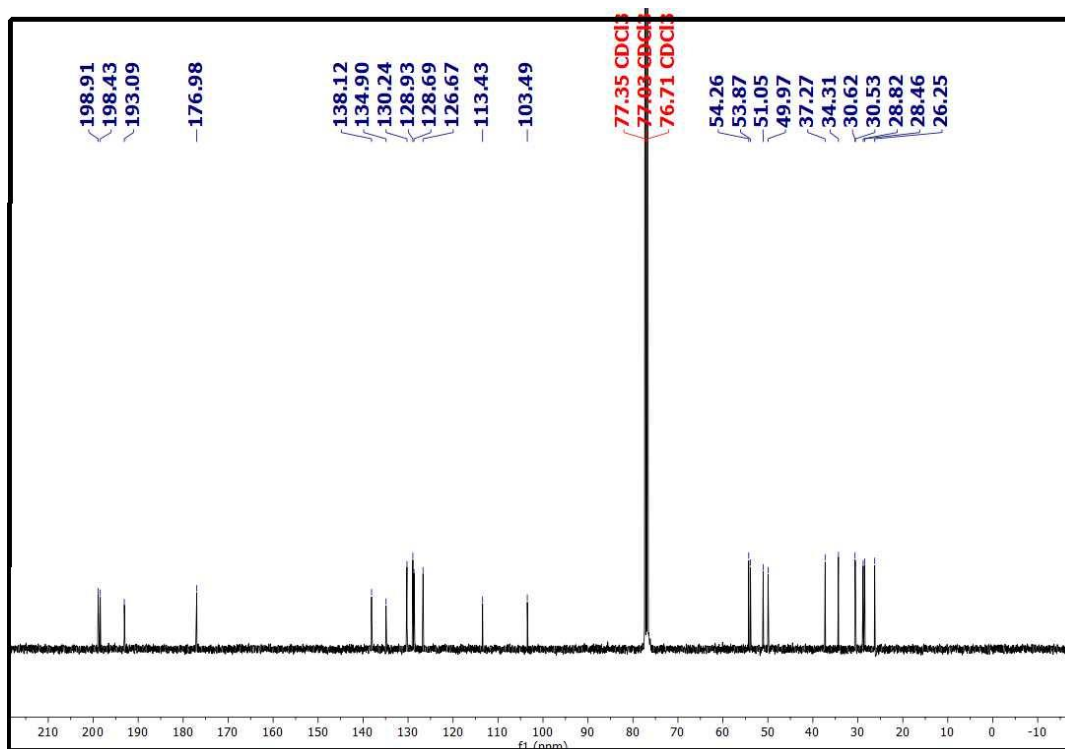

$^{13}\text{C}$  NMR of 7a

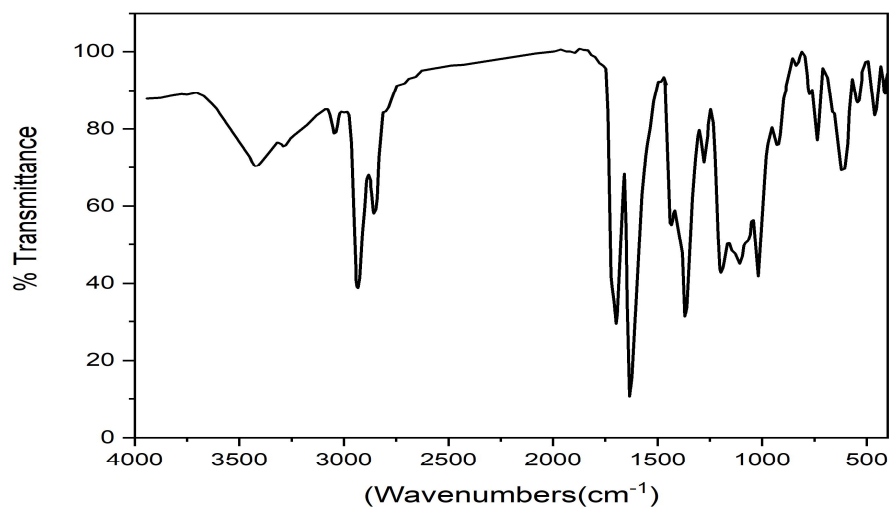

IR of 7a

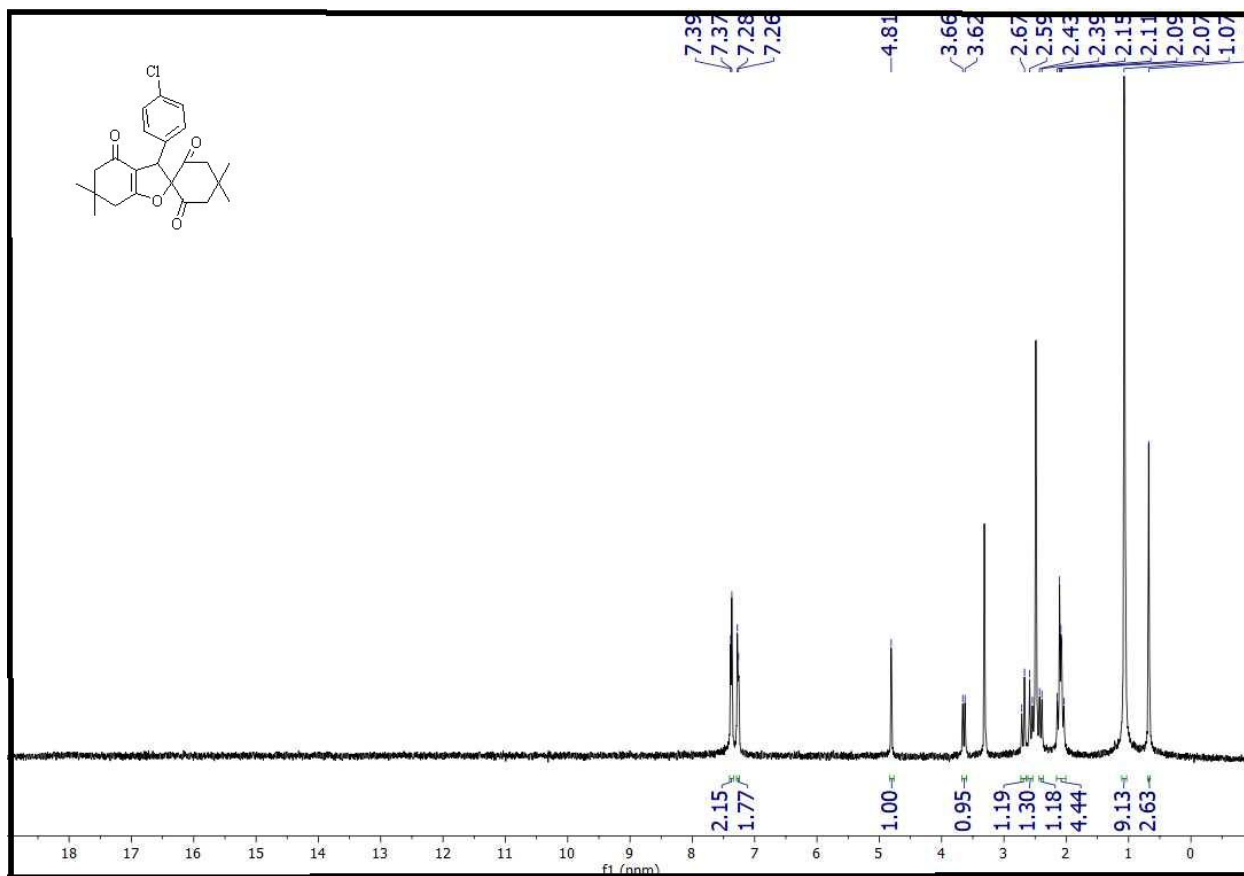

$^1\text{H}$  NMR of **8a**

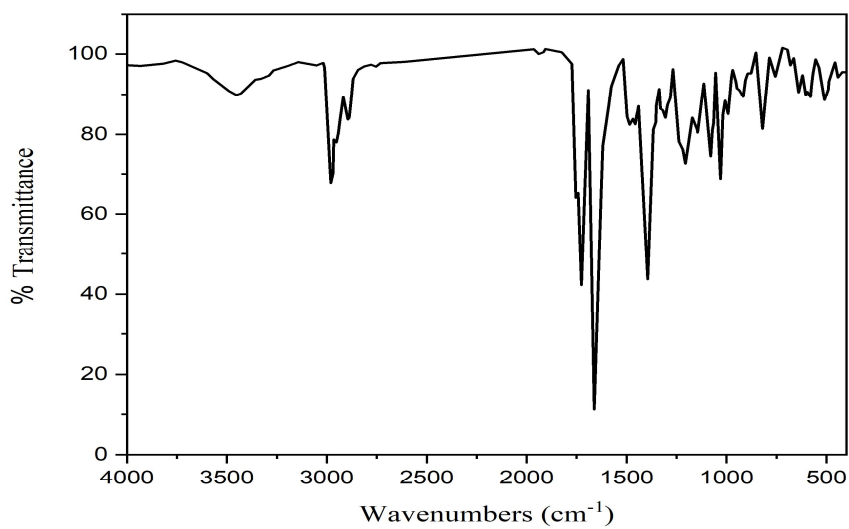

IR of **8a**

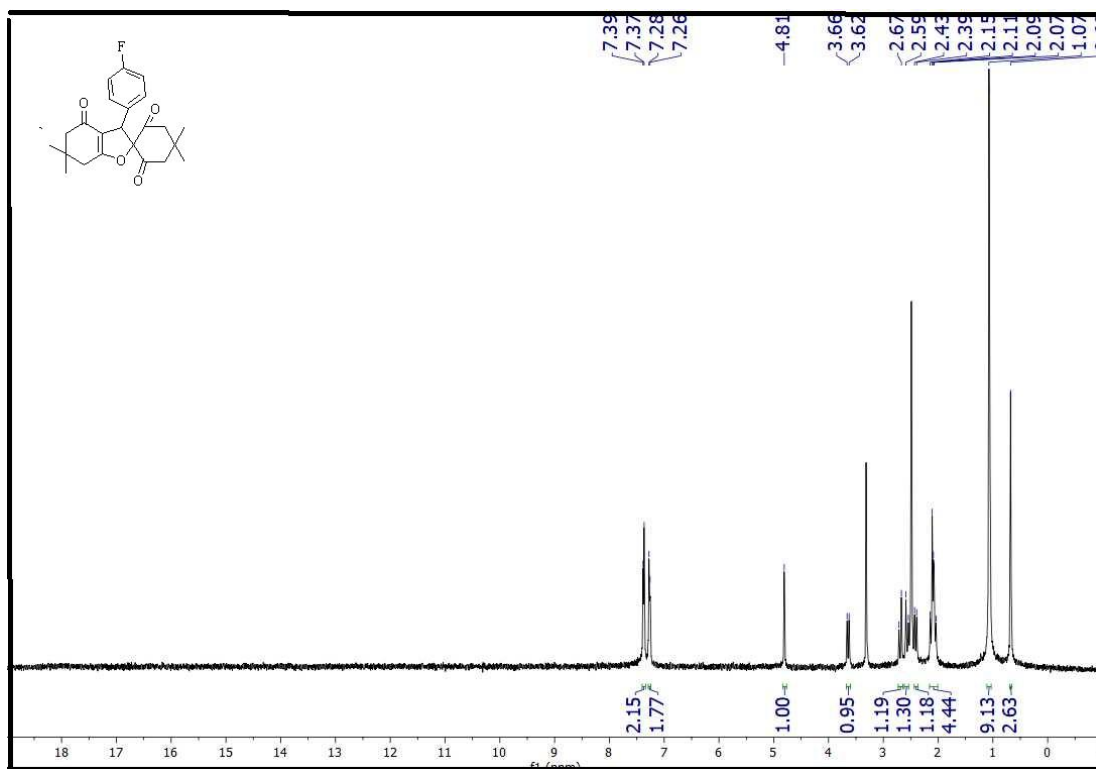

$^1\text{H}$  NMR of 9a

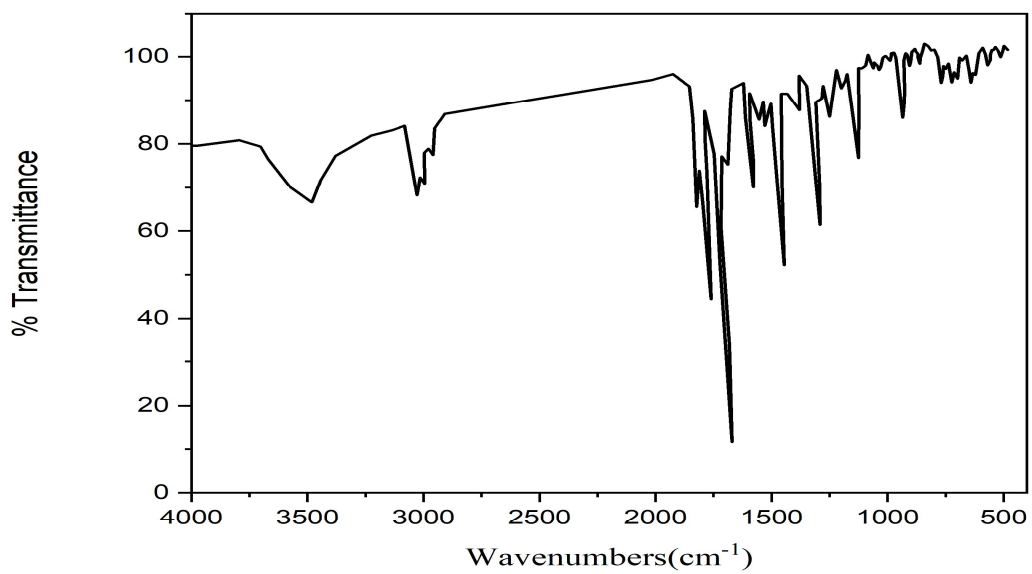

IR of 9a

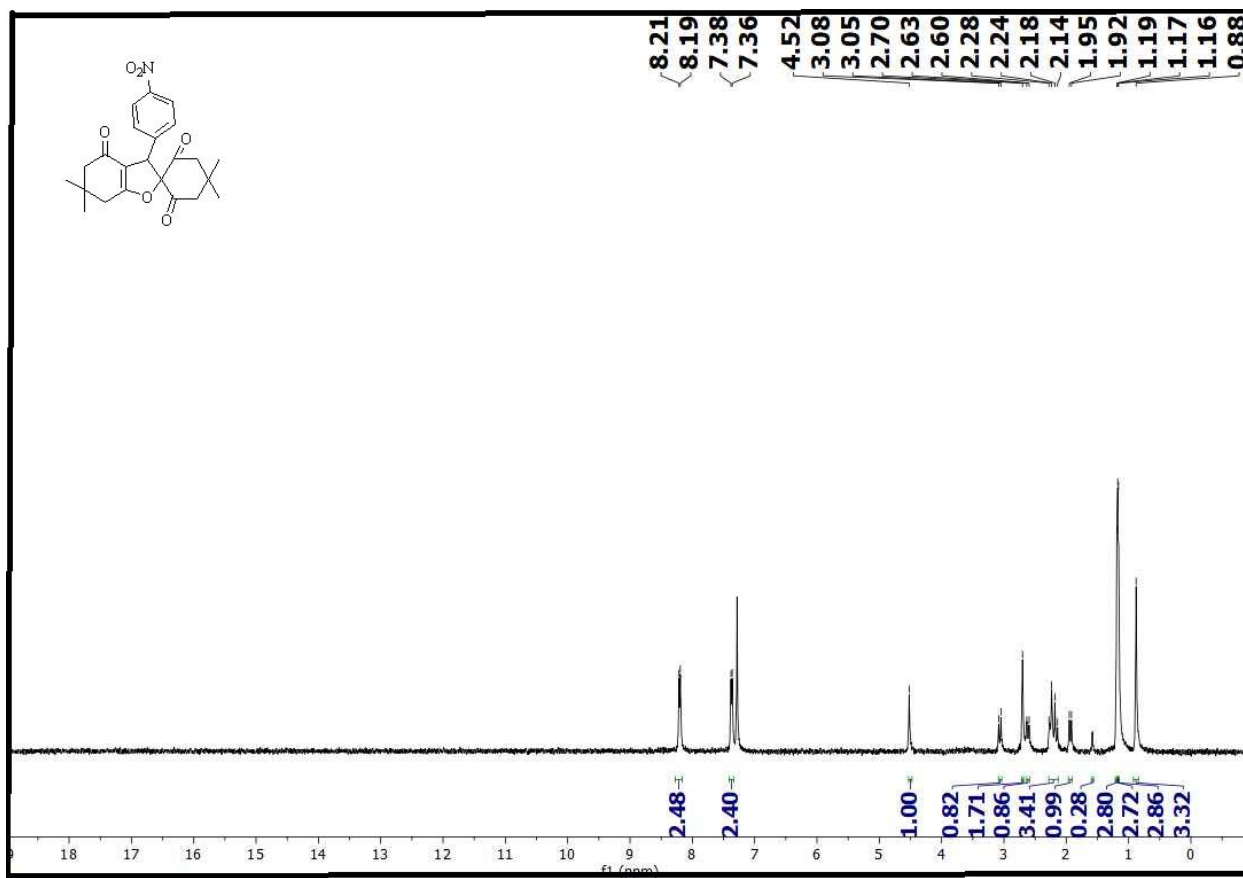

<sup>1</sup>H NMR of 10a

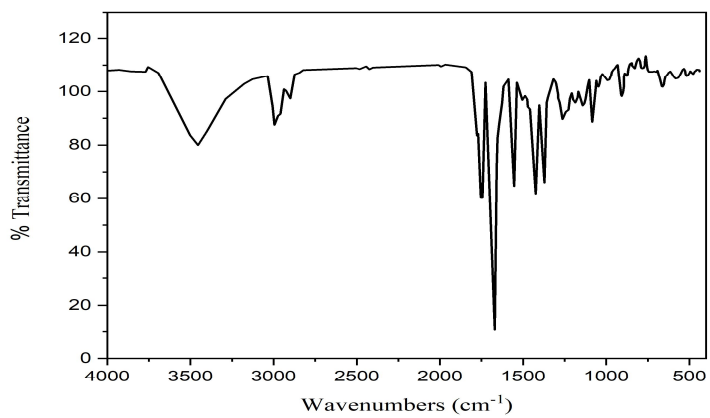

IR of 10a

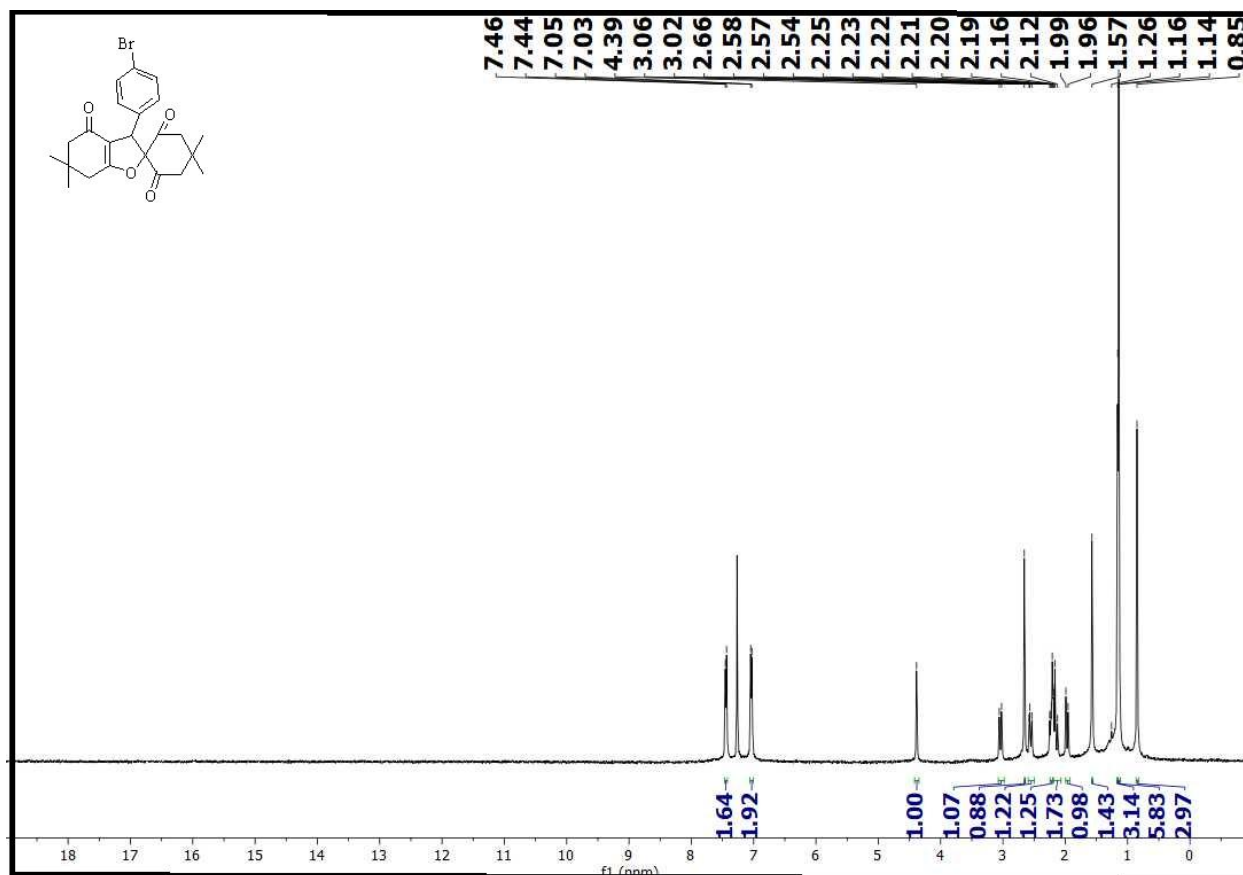

$^1\text{H}$  NMR of 11a

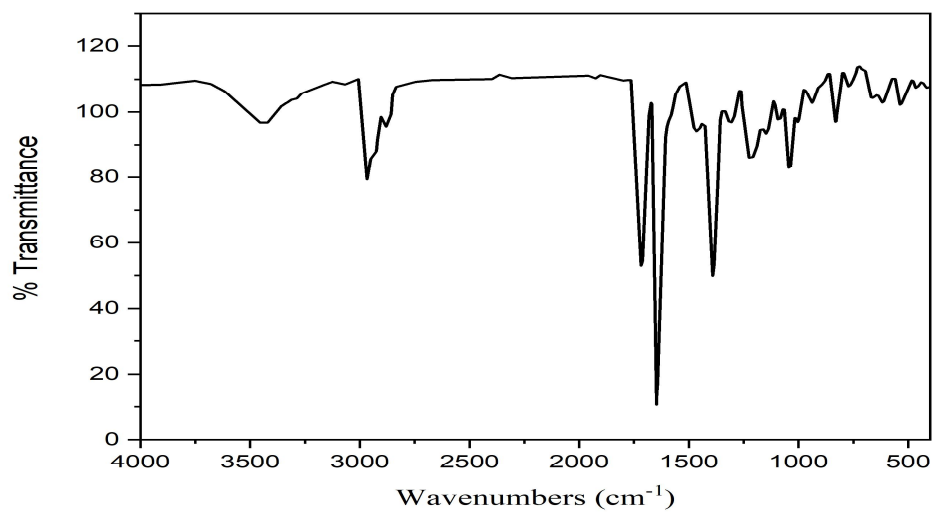

IR of 11a

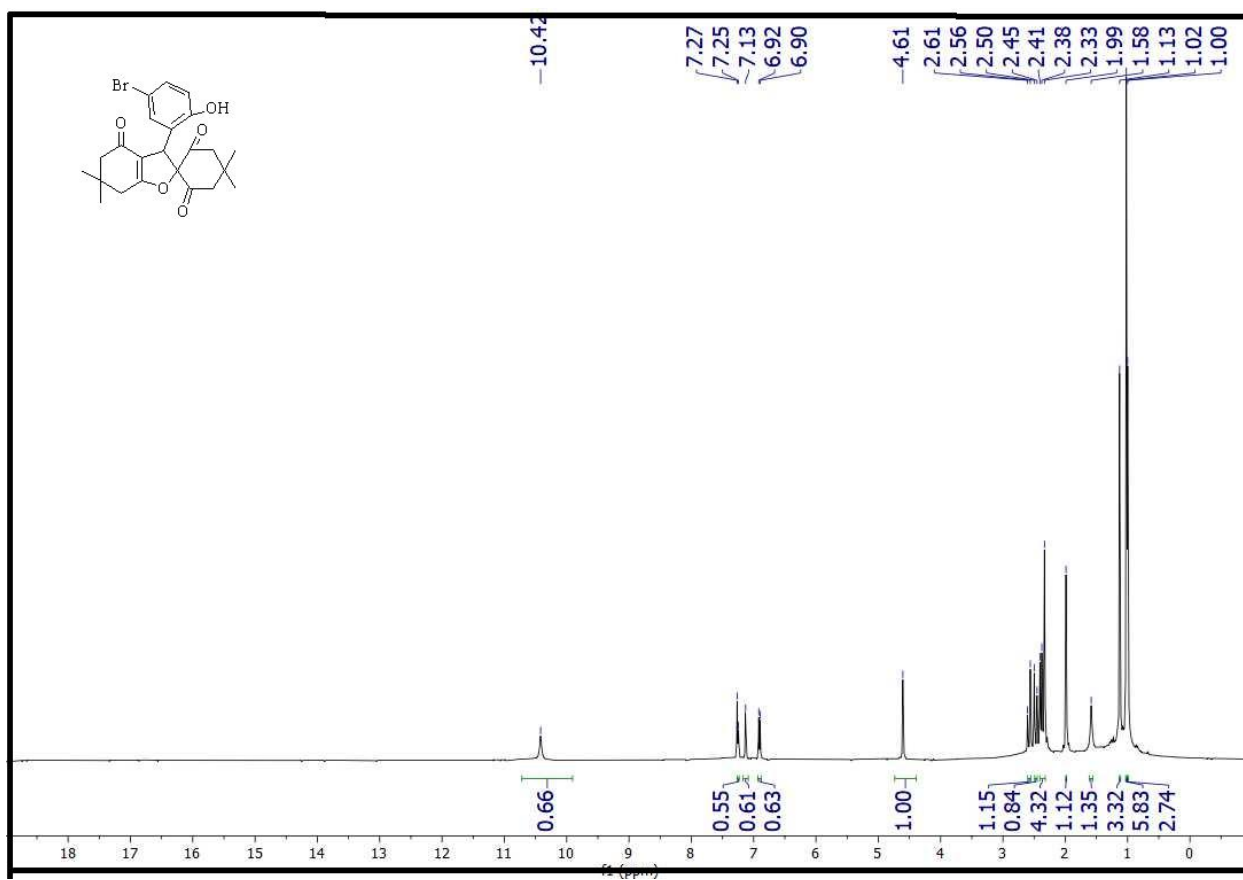

$^1\text{H}$  NMR of 12a

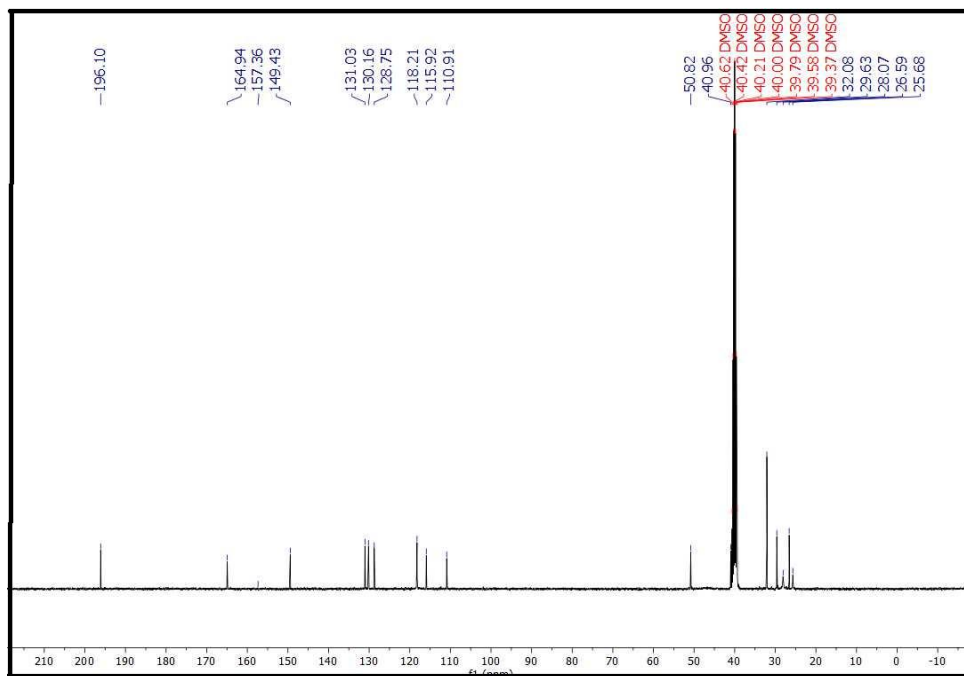

$^{13}\text{C}$  NMR of **12a**

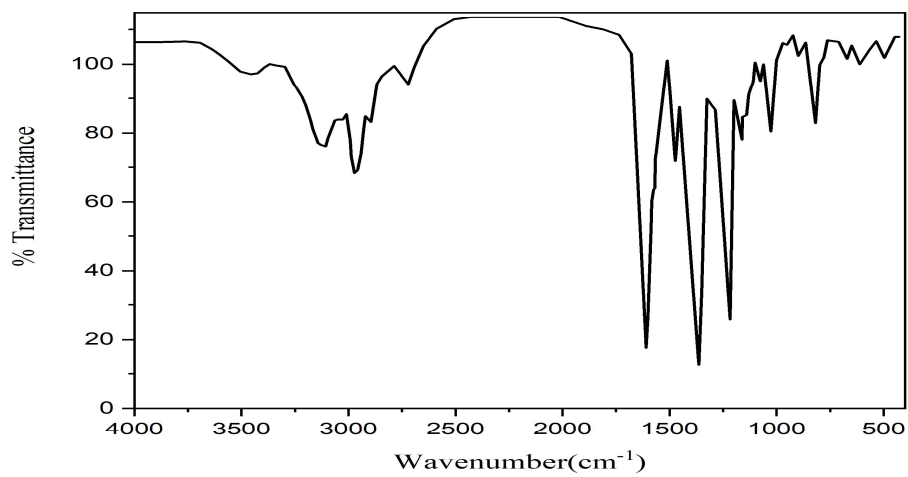

IR of **12a**
